# Supplementary material for: A highly rigid ditopic conjugate with orthogonal coordination axes and its zinc(ii) and copper(ii) complexes
Source: Royal Society of Chemistry journal article supplement (doi:10.1039/b713367g), 2008-01-01

## **Electronic supplementary information**

### **A highly rigid ditopic conjugate with orthogonal coordination axes and its zinc(II) and copper(II) complexes**

Benoît Champin, Valérie Sartor and Jean-Pierre Sauvage\*

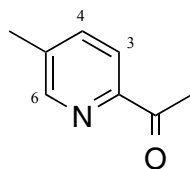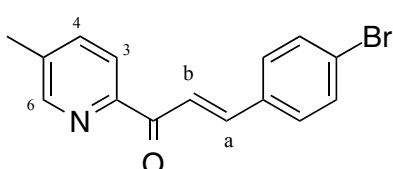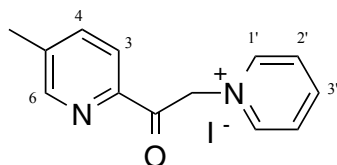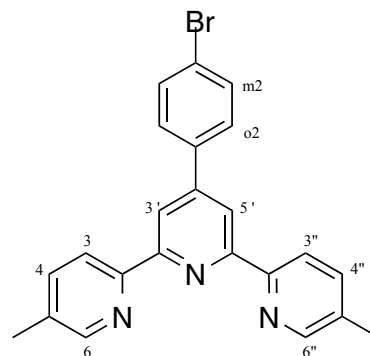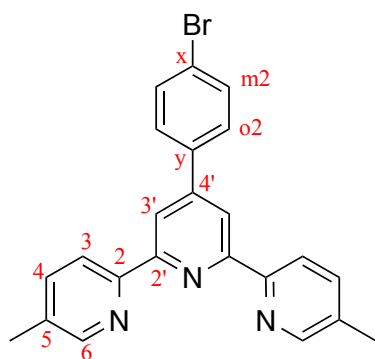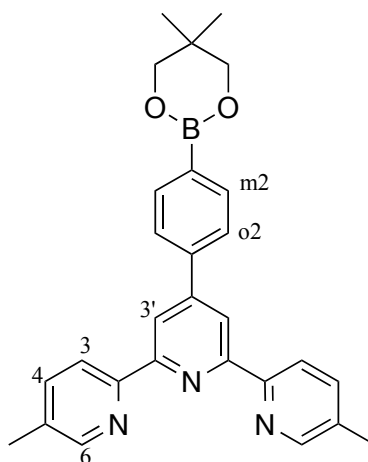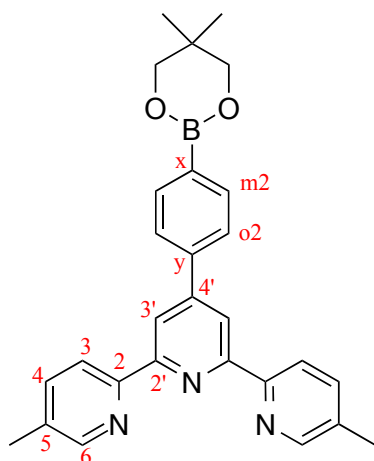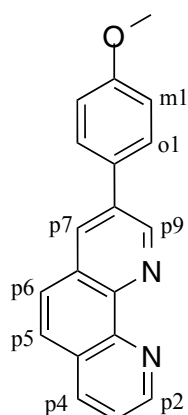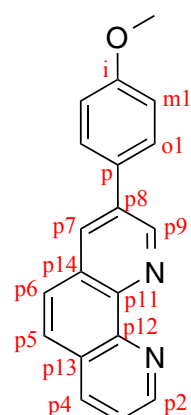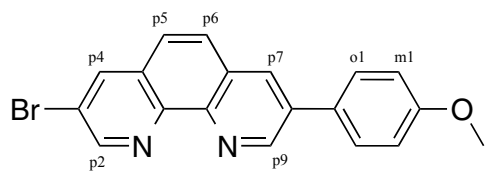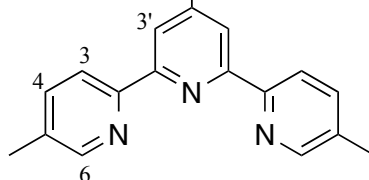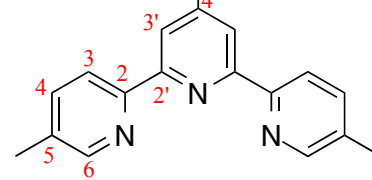

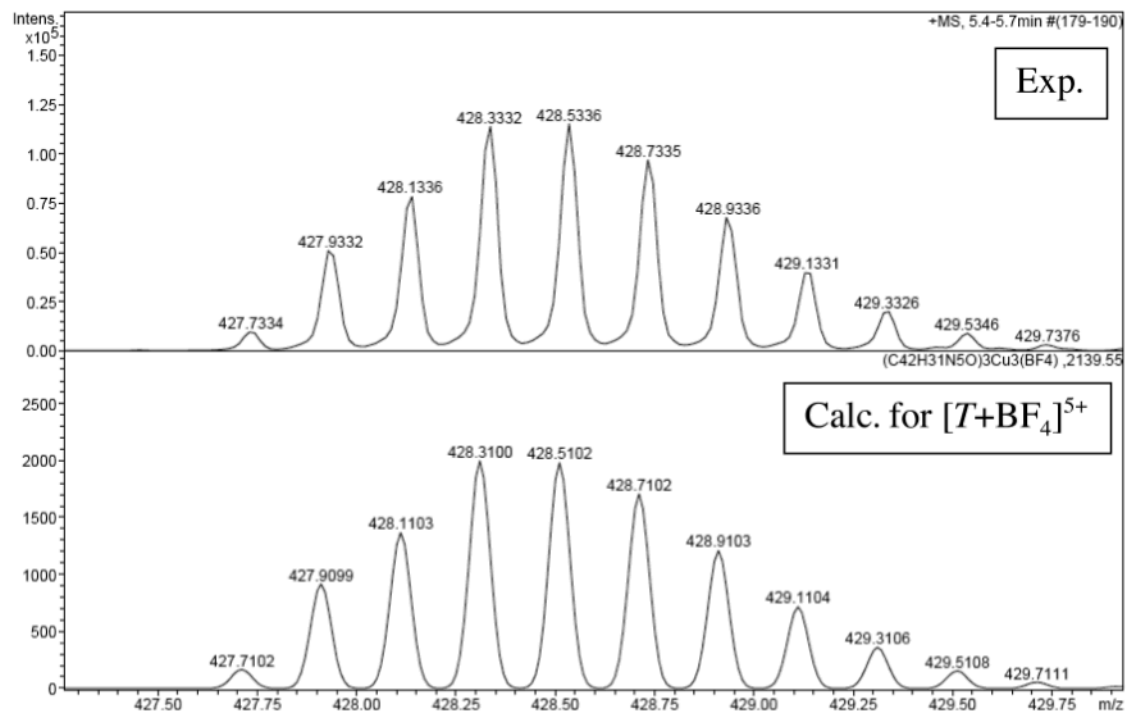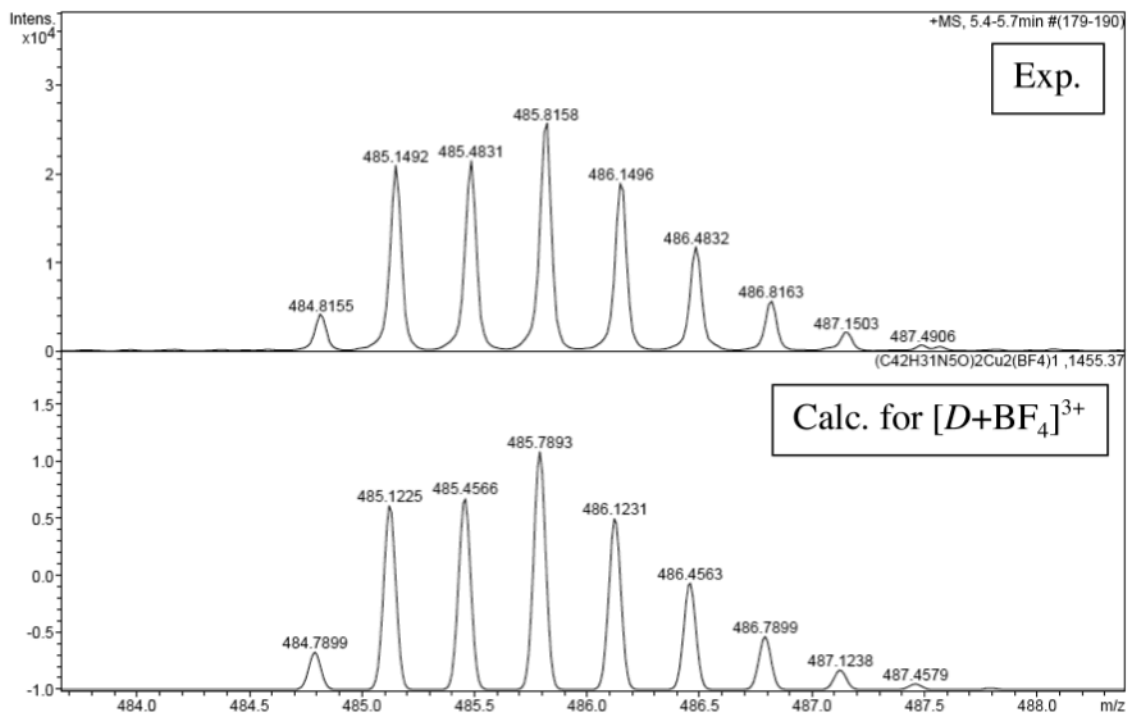

Supplement: b713367g.pdf [file b713367g.pdf]
